# Supplementary material
Source: Springer Nature journal article supplement (https://www.springermedizin.de/resource/supplementary/12885_2013_4734_MOESM2_ESM.pdf/9467140)

**A**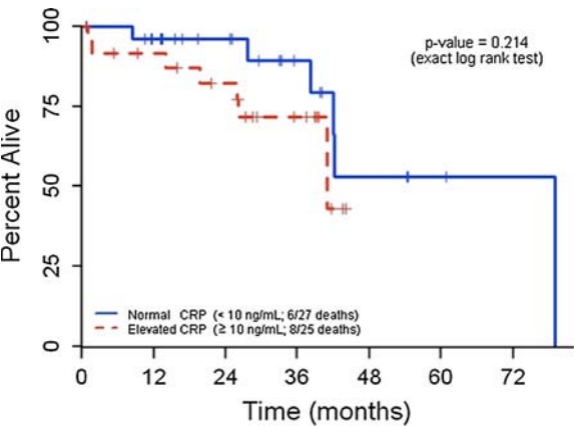**B**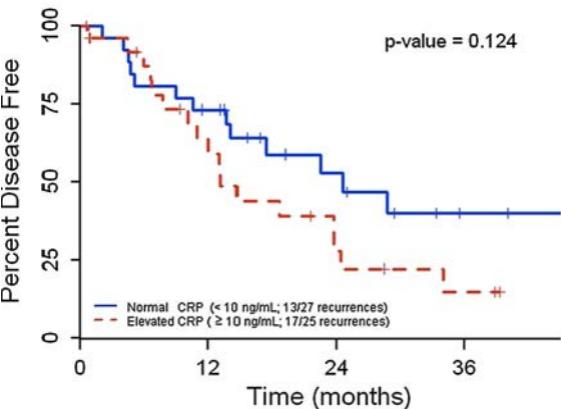

Supplement: MOESM2 [file 9467140]
